# Supplementary material
Source: HighWire-hosted journal article supplement (http://qshc.bmj.com/highwire/filestream/147174/field_highwire_adjunct_files/2/35353_Appendix_1-_Jackson_17_criteria.pdf)
Supplement: 35353_Appendix_1-_Jackson_17_criteria.pdf [file 35353_Appendix_1-_Jackson_17_criteria.pdf]

## **Appendix 1 – Jackson, Cheater & Reid (2008) Quality Assessment Criteria**

1. Explicit theoretical framework/literature review
2. Clear aims and objectives
3. Clear description of focal decision
4. Clear description of setting
5. Clear description of sample
6. Appropriate sampling procedure
7. Clear description of data collection
8. Clear description of data analysis
9. Evidence of critical reflection
10. Provision of recruitment data
11. Provision of attrition data
12. Valid and reliable outcomes
13. Findings reported for each outcome
14. Description of validity/reliability of results
15. Sufficient original data
16. Evidence of consumer involvement
17. Strengths and limitations stated
